# Supplementary material for: The Gold(I) Complex with Plant Hormone Kinetin Shows Promising In Vitro Anticancer and PPARγ Properties
Source: MDPI journal article supplement (doi:10.3390/ijms24032293), 2023-01-24
Supplement: s1 [file s1]

## Supplementary Materials

| Table of Contents                                                                                                                                                                                                                                                                                                                                                                                                                                                                                                                    | Page |
|--------------------------------------------------------------------------------------------------------------------------------------------------------------------------------------------------------------------------------------------------------------------------------------------------------------------------------------------------------------------------------------------------------------------------------------------------------------------------------------------------------------------------------------|------|
| <b>Fig. S1</b> Schematic representations of structures of [Au(kin)(PPh <sub>3</sub> )] ( <b>1</b> ) ( <i>left</i> ), free kinetin (Hkin) ( <i>middle</i> ) and free triphenylphosphine (PPh <sub>3</sub> ) ( <i>right</i> ) together with the atoms labelling for interpretation of NMR data.                                                                                                                                                                                                                                        | S3   |
| <b>Fig. S2</b> The IR spectra of [Au(kin)(PPh <sub>3</sub> )] ( <b>1</b> ) and free kinetin.                                                                                                                                                                                                                                                                                                                                                                                                                                         | S3   |
| <b>Fig. S3.</b> The ESI-MS spectrum of ( <b>1</b> ) measured in MeOH solution in positive ionization mode.                                                                                                                                                                                                                                                                                                                                                                                                                           | S4   |
| <b>Fig. S4</b> The TG/DSC curves characterizing the thermal decomposition of complex ( <b>1</b> ). The most significant mass changes in TG and peak temperatures in DSC record are noted.                                                                                                                                                                                                                                                                                                                                            | S4   |
| <b>Fig. S5</b> The N–H···N hydrogen bonds (cyan dashed lines) connecting two individual molecules of ( <b>1</b> ).                                                                                                                                                                                                                                                                                                                                                                                                                   | S5   |
| <b>Fig. S6</b> Part of crystal structure of ( <b>1</b> ) showing the C–H···N, C–H···C and C···C non-covalent contacts (red dotted lines) connecting individual molecules of ( <b>1</b> ) into a 3D structure.                                                                                                                                                                                                                                                                                                                        | S5   |
| <b>Table S1</b> Hydrogen bond for [Au(kin)(PPh <sub>3</sub> )] ( <b>1</b> ) [Å and °].                                                                                                                                                                                                                                                                                                                                                                                                                                               | S6   |
| <b>Fig. S7</b> The effects of ( <b>1</b> ), the starting complex [Au(PPh <sub>3</sub> )Cl] and reference drugs Auranofin and Cisplatin on intracellular ROS levels in A2780 cells after 24 h of incubation with half-cytotoxic concentrations of the compounds in the presence (Pyocyanin+) and absence (Pyocyanin-) of the well-known oxidative stress inducer pyocyanin. The statistical significance was considered at the following levels: * p<0.05, ** p<0.01, *** p<0.001 with respect to the untreated control group.        | S6   |
| <b>Fig. S8</b> The effects of ( <b>1</b> ), the starting complex [Au(PPh <sub>3</sub> )Cl] and reference drugs Auranofin and Cisplatin on intracellular superoxide levels in A2780 cells after 24 h of incubation with half-cytotoxic concentrations of the compounds in the presence (Pyocyanin+) and absence (Pyocyanin-) of the well-known oxidative stress inducer pyocyanin. The statistical significance was considered at the following levels: * p<0.05, ** p<0.01, *** p<0.001 with respect to the untreated control group. | S7   |
| <b>Table S2</b> Determination of cytotoxic effect of the tested compounds expressed as IC <sub>50</sub> values for 24 h treatment. Data are shown as mean ± SEM.                                                                                                                                                                                                                                                                                                                                                                     | S7   |
| <b>Fig. S9</b> The effect of the tested compounds on the amount and intracellular localisation of PPARγ in THP1-Blue™ NF-κB macrophages after 1 h pre-treatment.                                                                                                                                                                                                                                                                                                                                                                     | S8   |

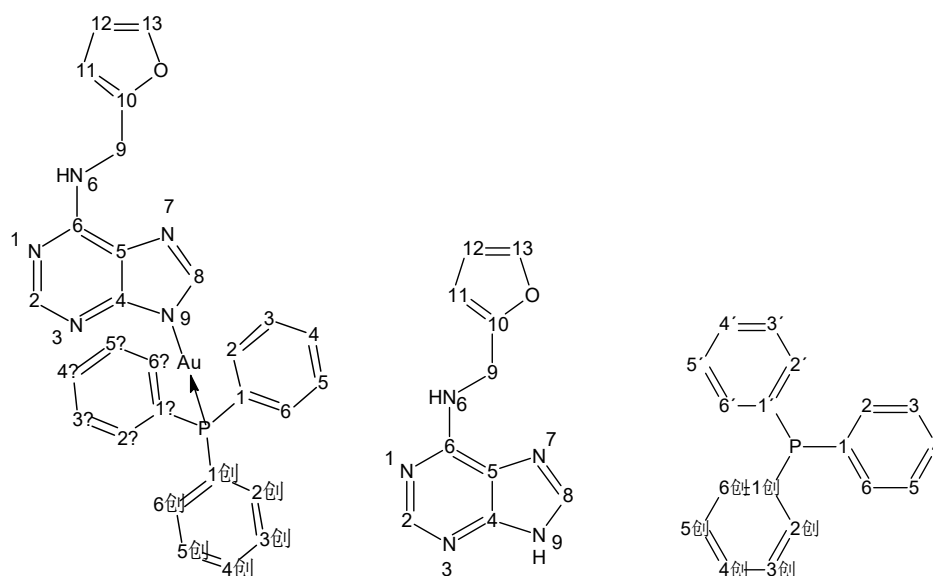

**Fig. S1** Schematic representations of structures of [Au(kin)(PPh<sub>3</sub>)] (**1**) (*left*), free kinetin (Hkin) (*middle*) and free triphenylphosphine (PPh<sub>3</sub>) (*right*) together with the atoms labelling for interpretation of NMR data.

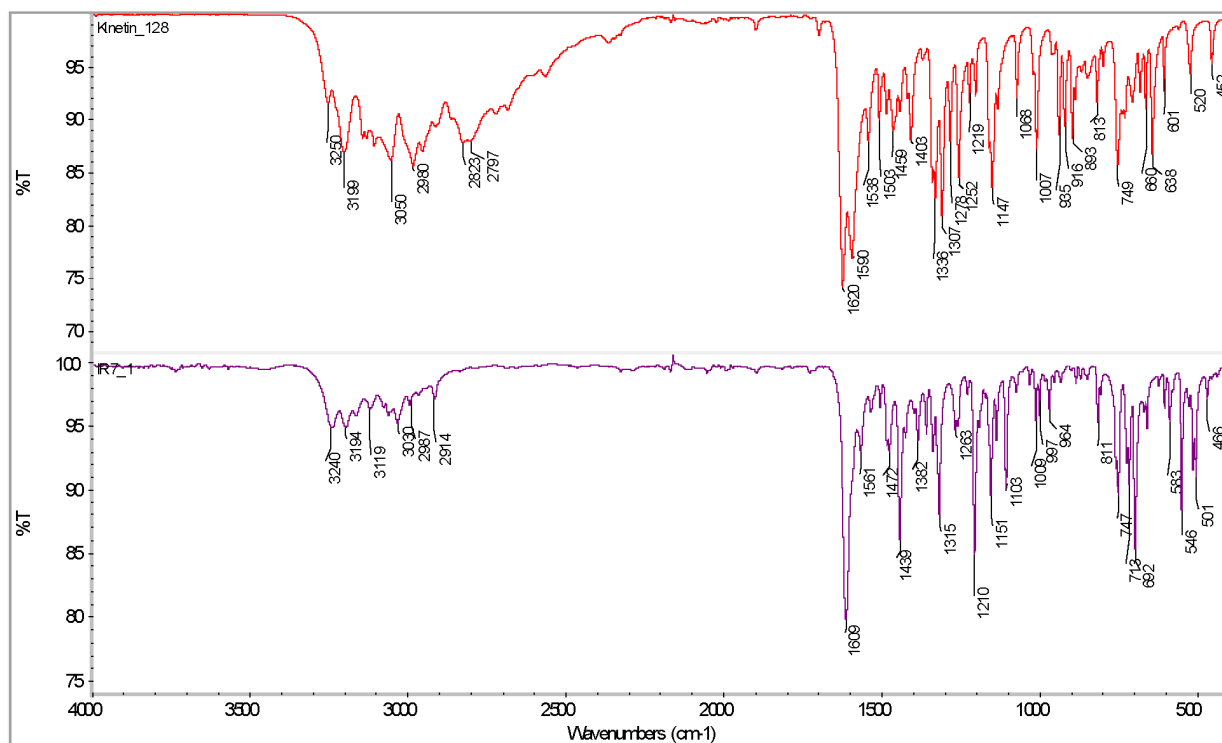

**Fig. S2** The IR spectra of  $[\text{Au}(\text{kin})(\text{PPh}_3)]$  (**1**) (down) and free kinetin (up).

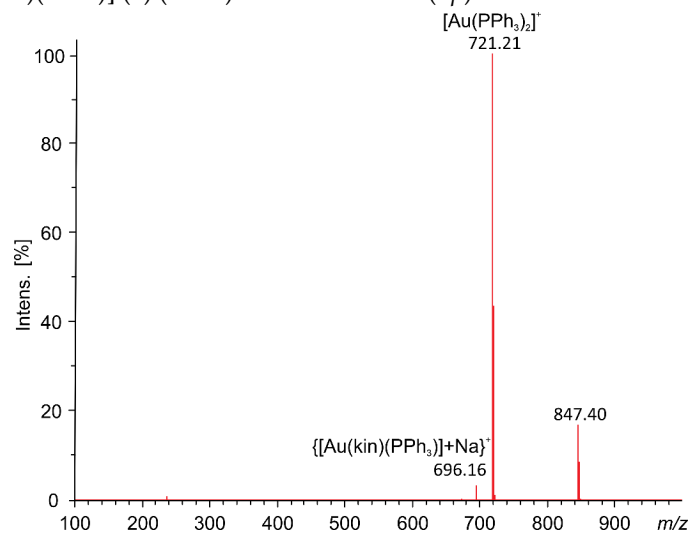

**Fig. S3.** The ESI-MS spectrum of (**1**) measured in MeOH solution in positive ionization mode.

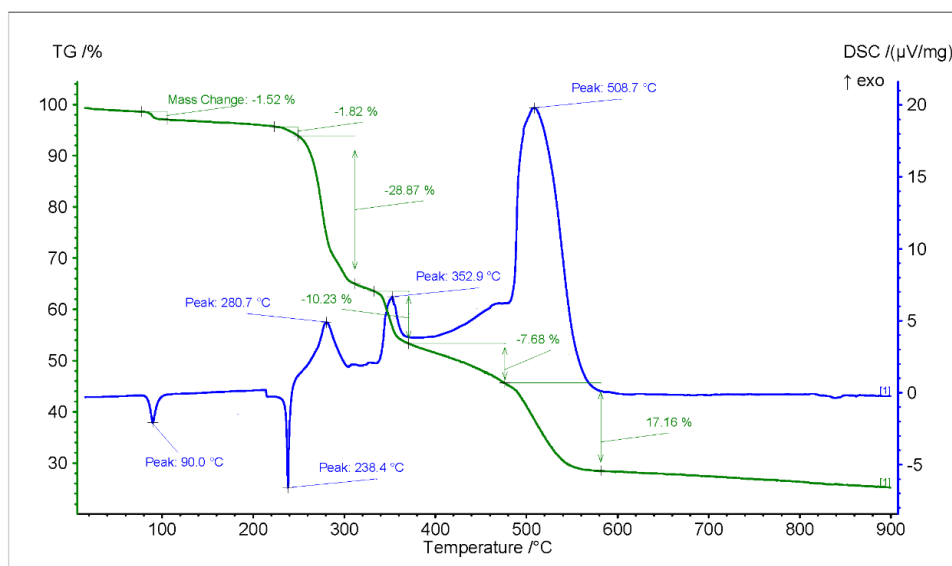

**Fig. S4** The TG/DSC curves characterizing the thermal decomposition of complex (**1**). The most significant mass changes in TG and peak temperatures in DSC record are noted.

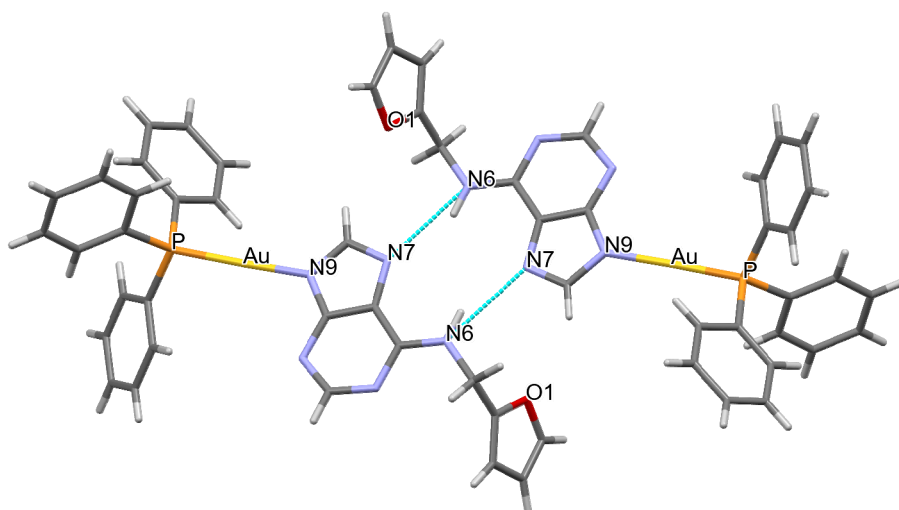

**Fig. S5** The N-H...N hydrogen bonds (cyan dashed lines) connecting two individual molecules of (1).

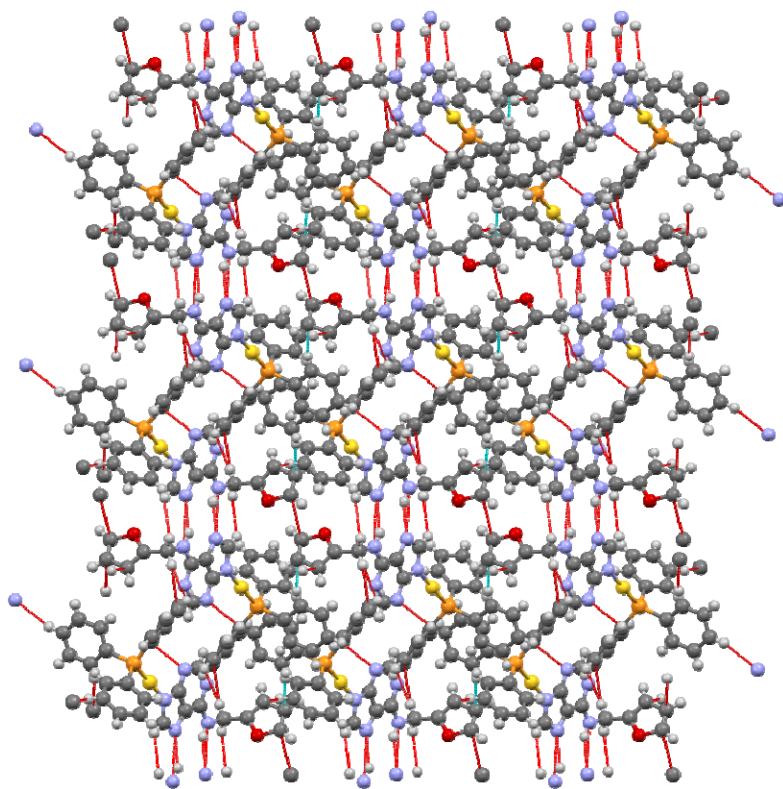

**Fig. S6** Part of crystal structure of (1) showing the C-H...N, C-H...C and C...C non-covalent contacts (red dotted lines) connecting individual molecules of (1) into a 3D structure.

**Table S1** Hydrogen bond for [Au(kin)(PPh<sub>3</sub>)] (**1**) [Å and °].

| D–H...A             | d(D–H) | d(H...A) | d(D...A) | <(DHA) |
|---------------------|--------|----------|----------|--------|
| N(6)–H(6A)...N(7)#1 | 0.86   | 2.20     | 2.988(5) | 151.4  |

Symmetry transformation used to generate equivalent atoms: #1 -x, -y+1, -z

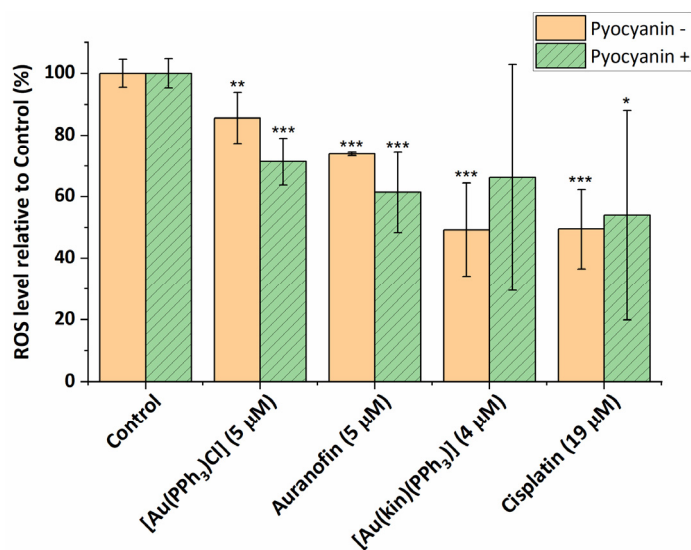

**Fig. S7** The effects of (**1**), the starting complex [Au(PPh<sub>3</sub>)Cl] and reference drugs *Auranofin* and *Cisplatin* on intracellular ROS levels in A2780 cells after 24 h of incubation with half-cytotoxic concentrations of the compounds in the presence (Pyocyanin+) and absence (Pyocyanin-) of the well-known oxidative stress inducer pyocyanin. The statistical significance was considered at the following levels: \*  $p < 0.05$ , \*\*  $p < 0.01$ , \*\*\*  $p < 0.001$  with respect to the untreated control group.

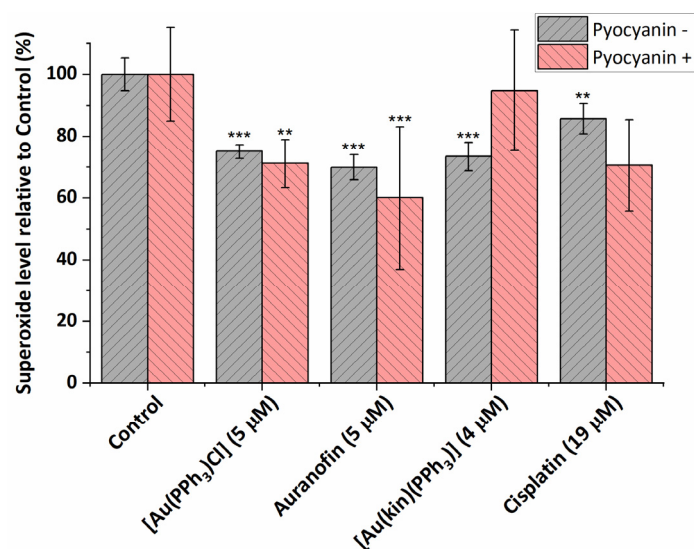

**Fig. S8** The effects of (1), the starting complex [Au(PPh<sub>3</sub>)Cl] and reference drugs *Aurano-fin* and *Cisplatin* on intracellular superoxide levels in A2780 cells after 24 h of incubation with half-cytotoxic concentrations of the compounds in the presence (Pyocyanin+) and absence (Pyocyanin-) of the well-known oxidative stress inducer pyocyanin. The statistical significance was considered at the following levels: \*\* p<0.01, \*\*\* p<0.001 with respect to the untreated control group.

**Table S2** Determination of cytotoxic effect of the tested compounds expressed as IC<sub>50</sub> values for 24 h treatment. Data are shown as mean ± SEM.

|                                  | IC <sub>50</sub> ± SEM (95% confidence interval) |
|----------------------------------|--------------------------------------------------|
| [Au(kin)(PPh <sub>3</sub> )] (1) | 1.0 ± 1.0 μM (0.9 – 1.1 μM)                      |
| Aurano-fin                       | 0.5 ± 1.1 μM (0.4 – 0.6 μM)                      |
| [Au(PPh <sub>3</sub> )Cl]        | 1.1 ± 1.1 μM (1.0 – 1.2 μM)                      |
| Kinetin                          | > 10 μM                                          |

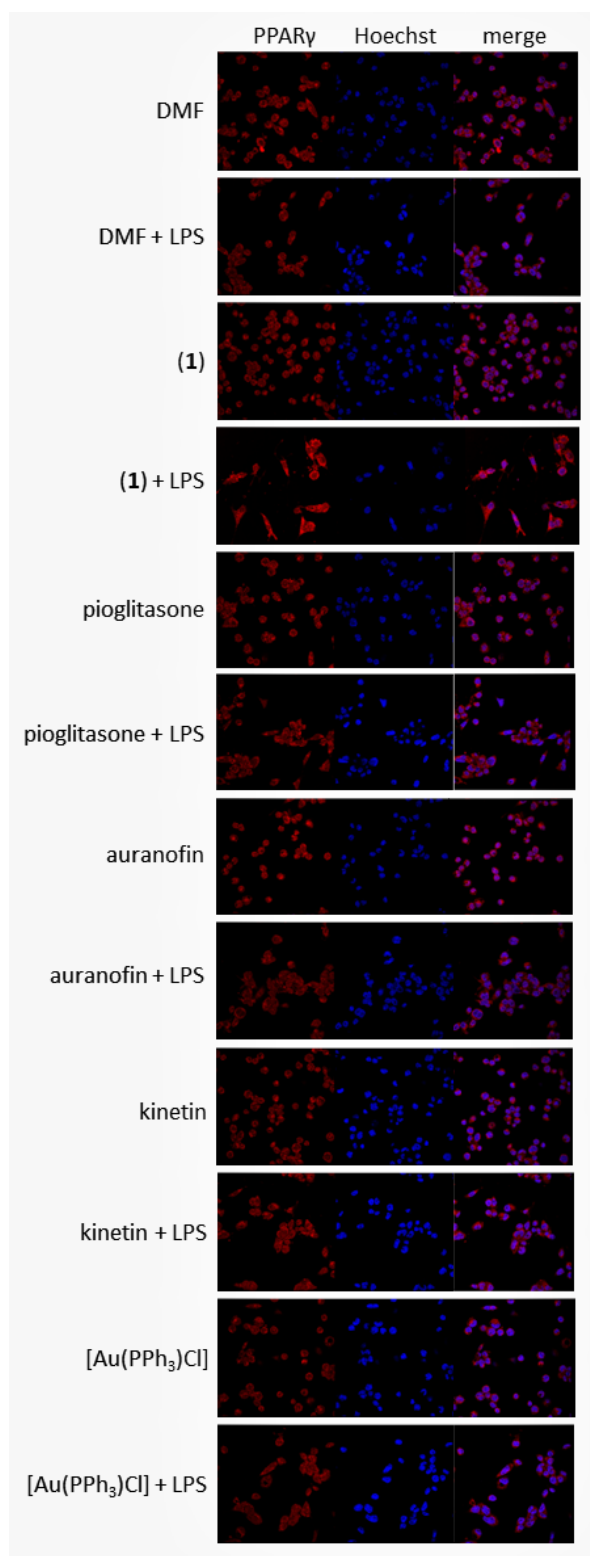

**Fig. S9** The effect of the tested compounds on the amount and intracellular localisation of PPAR $\gamma$  in THP1-Blue<sup>TM</sup> NF- $\kappa$ B macrophages after 1 h pre-treatment.
